# Supplementary material
Source: PubMed Central journal article supplement (PMC2827354)
Supplement: NIHMS167236-supplement-supplementary.pdf [file NIHMS167236-supplement-supplementary.pdf]

## Supplementary Note

### Clinical data for study subjects

**Patients with biopsy-proven FSGS** were referred from nephrologists at 24 centers within the United States or by self-referral to the NIDDK, NIH. In all cases the renal biopsies were performed based upon clinical indications, not as a part of the present study. Inclusion and exclusion criteria, by group are the following:

1) Patients with FSGS: renal biopsy showing focal and segmental glomerulosclerosis (FSGS). Included were adult and pediatric patients with idiopathic FSGS and HIV-1-associated FSGS with pathological features of FSGS and collapsing FSGS, respectively. Patients with hyperfiltration FSGS (reduced renal mass, chronic interstitial nephritis, sickle cell anemia, or obesity with BMI.40 kg/m<sup>2</sup>) were excluded. Renal function and date of initiation of renal replacement therapy was recorded patients at baseline and follow-up visits.

2) Hypernormal controls with HIV-1 infection and without kidney disease: Adults with serologically confirmed HIV-1 infection for  $\geq 8$  years and lacking clinical renal disease, as evidenced by normal serum creatinine concentrations and urine protein/creatinine ratio  $<0.5$  g/g or 24 hour urine protein excretion  $< 500$  mg/day. Participants were enrolled in the AIDS Link to the Intravenous Experience Cohort Study (ALIVE) in Baltimore, Maryland.

3) Normal blood donors were from the NIH Blood Bank and the National Cancer Institute-Frederick normal donor programs. Participants were excluded if they belonged to an HIV-1 risk group or tested seropositive for HIV-1 infection or had evidence or history of renal disease.

### Wake Forest University School of Medicine (WFUSM) Extension Cohorts

WFUSM cases and controls were recruited at dialysis facilities, medical clinics, or community health screenings. All individuals were born in North Carolina, South Carolina, Virginia, Georgia or Tennessee.

1) Hypertension-associated ESRD (H-ESRD) was diagnosed when high blood pressure preceded initiation of renal replacement therapy in the presence of hypertensive target organ damage and either low level proteinuria ( $\leq 30$  mg/dL on urine dipstick,  $<0.5$  gram protein/24 hours on timed urine collection, or urine protein:creatinine ratio  $<0.5$  g/g) or in the absence of quantification of proteinuria.

2) Type 2 diabetes-associated ESRD was diagnosed when diabetes developed after the age of 34 years with  $\geq 5$  years diabetes duration prior to dialysis onset in the presence of either diabetic retinopathy and/or proteinuria exceeding 500 mg/day or 100 mg/dl on urinalysis.

3) Unrelated, non-diabetic control subjects - denied a personal or family history (first degree relatives) of diabetes or kidney disease, kidney failure, dialysis or kidney transplantation.

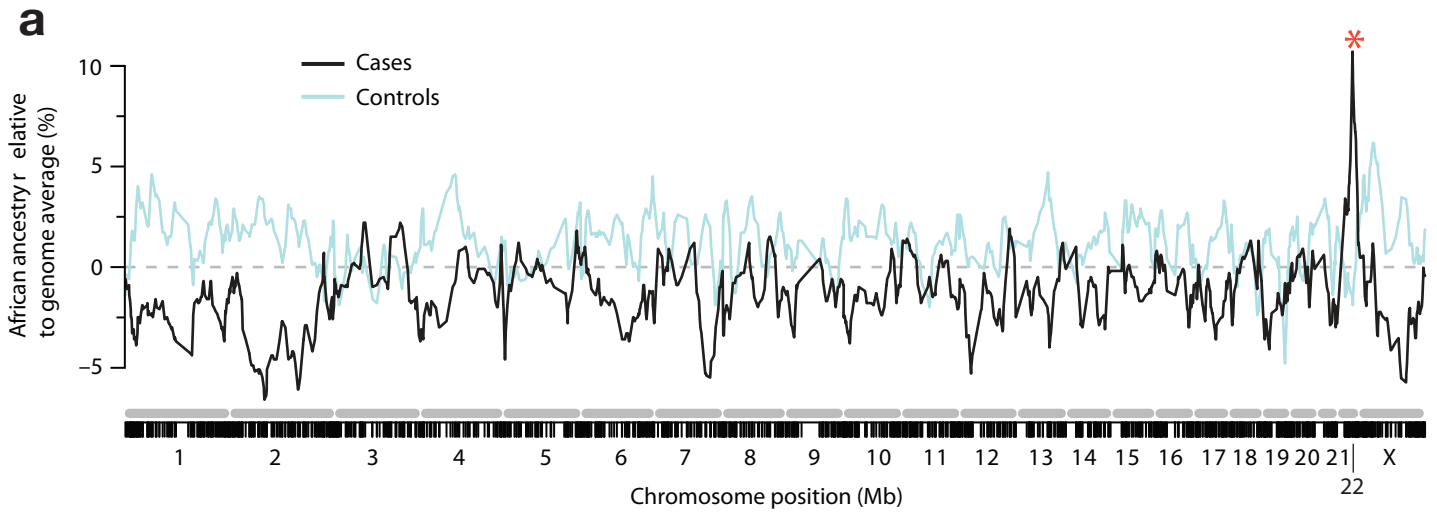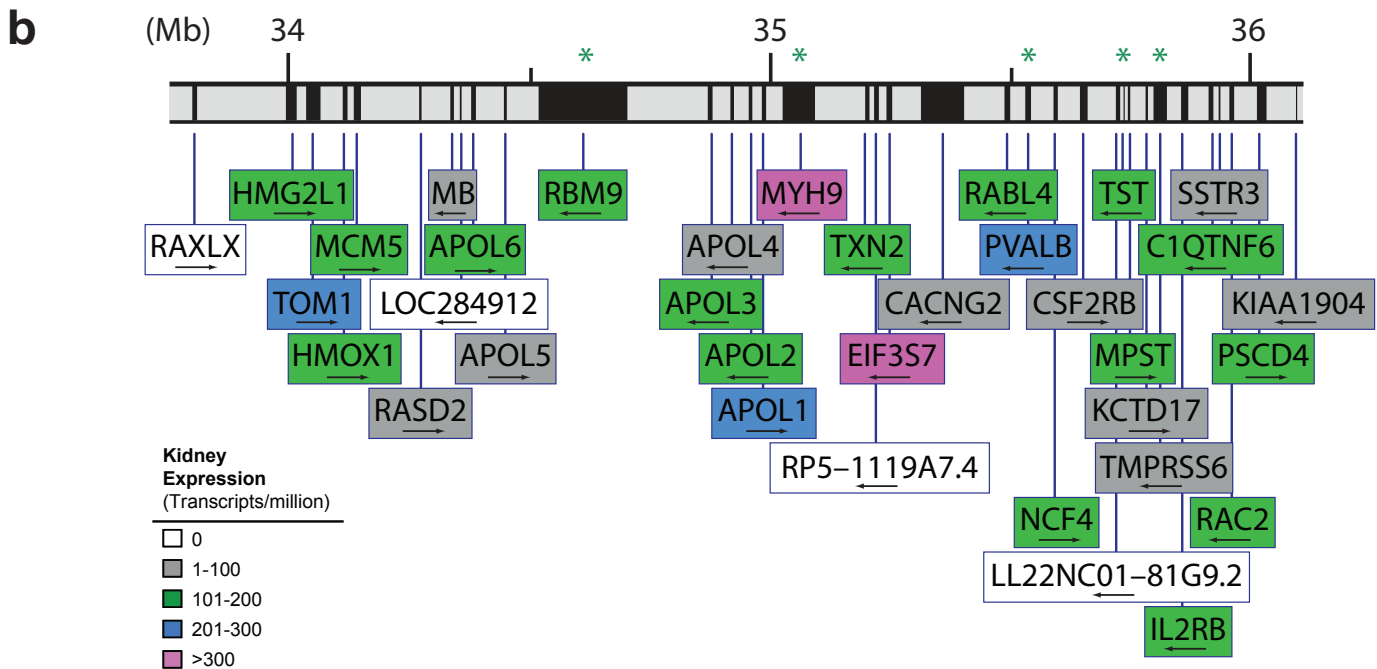

**Supplementary Figure 1** (a) The change in African ancestry across the genome. A comparison to the genome average for cases (black) and controls (teal) from the ANCESTRY-MAP analysis is shown. The elevated African ancestry of cases on chromosome 22 is marked with a red asterisk (\*). The X axis consists of a concatenated set of chromosomes (gray) with MALD markers interrogated indicated below (black). (b) 35 genes within the 95% credible interval of the MALD chromosome 22 peak. The chromosomal segment (coordinates for build 36) is shown with genes in black; MYH9 and the four genes with SNPs typed for negative controls in the fine mapping analysis are noted by asterisks. Genes are colored according to reported levels of expression in kidney in transcripts/million: white 0; gray 1-100; green 101-200; blue 201-300; red >300. Data from Gene Expression Omnibus (<http://www.ncbi.nlm.nih.gov/geo/>) and reference 24.

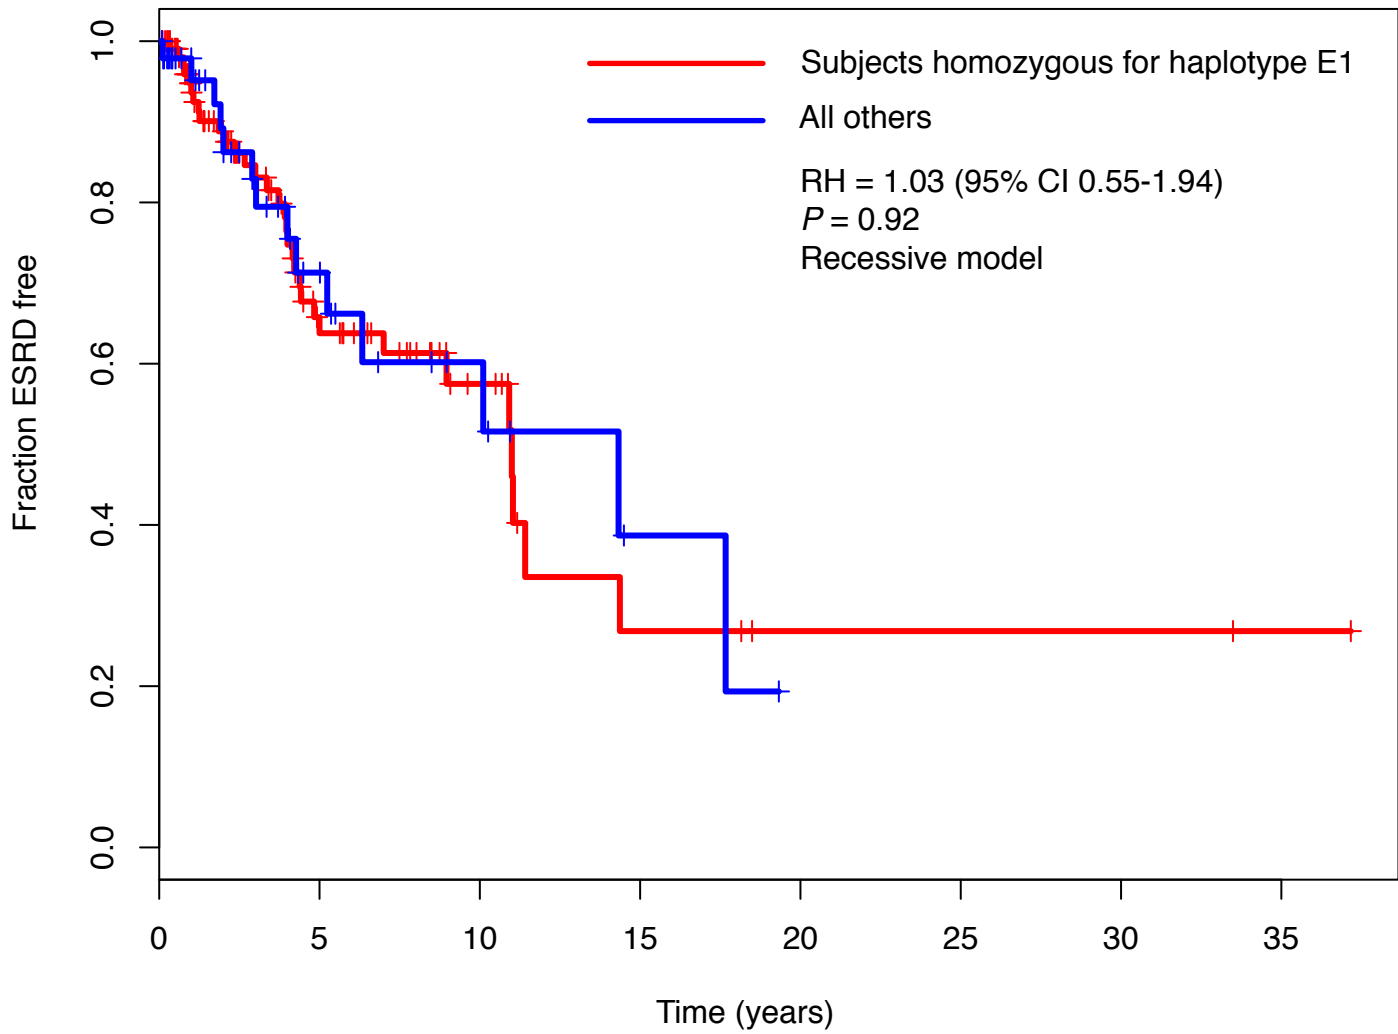

**Supplementary Figure 2** Kaplan-Meier plot of progression to ESKD for 161 African American FSGS cases, comparing subjects homozygous for the FSGS susceptibility haplotype E-1 with all other subjects. Cox model results for this comparison are shown.

Supplementary Table 1 *MYH9* and adjacent gene SNP associations with FSGS for African Americans, and limited to subjects with only local African ancestry at the tested SNP

|                |            | African-American FSGS cases (n=190)<br>and controls (n=222) with MALD data |                                    |                           |                                                  |                           | 2x local African<br>Ancestry<br>(n=245) <sup>a</sup>                                            |                |                          |
|----------------|------------|----------------------------------------------------------------------------|------------------------------------|---------------------------|--------------------------------------------------|---------------------------|-------------------------------------------------------------------------------------------------|----------------|--------------------------|
| Gene           | SNP        | Genomic<br>position                                                        | Association at<br>SNP <sup>b</sup> |                           | Admixture<br>Association not<br>explained by SNP |                           | Percentage of<br>locus-specific<br>FSGS<br>association<br>explained by<br>SNP genotype<br>alone | OR             | P                        |
|                |            |                                                                            | X <sup>2</sup>                     | P <sup>c</sup>            | X <sup>2</sup>                                   | P                         |                                                                                                 |                |                          |
| <i>RBM9</i>    | rs5750175  | 34.479                                                                     | 0.7                                | 0.39                      | <b>57.0</b>                                      | <b>4x10<sup>-14</sup></b> | 1                                                                                               | 1.37           | 0.14                     |
|                | rs5755943  | 34.496                                                                     | 0.7                                | 0.41                      | <b>49.5</b>                                      | <b>2x10<sup>-12</sup></b> | 1                                                                                               | 0.98           | 1                        |
|                | rs7078     | 35.008                                                                     | 11.0                               | 0.0009                    | <b>40.6</b>                                      | <b>2x10<sup>-10</sup></b> | 21                                                                                              | 3.07           | 0.005                    |
|                | rs12107    | 35.008                                                                     | 11.1                               | 0.0009                    | <b>42.2</b>                                      | <b>8x10<sup>-11</sup></b> | 21                                                                                              | 3.08           | 0.03                     |
|                | rs735853   | 35.009                                                                     | 37.8                               | <b>8x10<sup>-10</sup></b> | <b>22.7</b>                                      | <b>2x10<sup>-6</sup></b>  | 62                                                                                              | ∞ <sup>d</sup> | 0.10                     |
|                | rs5756129  | 35.014                                                                     | 21.6                               | <b>3x10<sup>-6</sup></b>  | <b>42.6</b>                                      | <b>7x10<sup>-11</sup></b> | 34                                                                                              | <b>3.39</b>    | <b>0.0001</b>            |
|                | rs5756130  | 35.014                                                                     | 9.2                                | 0.002                     | <b>55.9</b>                                      | <b>8x10<sup>-14</sup></b> | 14                                                                                              | 3.21           | 0.001                    |
|                | rs11549907 | 35.015                                                                     | 5.3                                | 0.02                      | <b>52.2</b>                                      | <b>5x10<sup>-13</sup></b> | 9                                                                                               | 1.70           | 0.18                     |
|                | rs875725   | 35.022                                                                     | 11.5                               | 0.0007                    | <b>56.1</b>                                      | <b>7x10<sup>-14</sup></b> | 17                                                                                              | 1.97           | 0.092                    |
|                | rs2187776  | 35.025                                                                     | 1.5                                | 0.22                      | <b>46.4</b>                                      | <b>1x10<sup>-11</sup></b> | 3                                                                                               | 0.99           | 1                        |
| <i>MYH9</i>    | rs4821480  | 35.025                                                                     | 61.5                               | <b>4x10<sup>-15</sup></b> | <b>12.6</b>                                      | <b>0.0004</b>             | 83                                                                                              | 3.24           | 0.003                    |
|                | rs2032487  | 35.025                                                                     | 59.8                               | <b>1x10<sup>-14</sup></b> | <b>15.5</b>                                      | <b>8x10<sup>-5</sup></b>  | 79                                                                                              | <b>2.80</b>    | <b>0.0004</b>            |
|                | rs4821481  | 35.026                                                                     | 64.4                               | <b>1x10<sup>-15</sup></b> | <b>13.0</b>                                      | <b>0.0003</b>             | 83                                                                                              | <b>3.21</b>    | <b>6x10<sup>-5</sup></b> |
|                | rs3752462  | 35.040                                                                     | 44.5                               | <b>3x10<sup>-11</sup></b> | <b>24.5</b>                                      | <b>8x10<sup>-7</sup></b>  | 65                                                                                              | <b>3.17</b>    | <b>1x10<sup>-4</sup></b> |
|                | rs5756152  | 35.042                                                                     | 48.0                               | <b>4x10<sup>-12</sup></b> | <b>33.1</b>                                      | <b>9x10<sup>-9</sup></b>  | 59                                                                                              | <b>2.26</b>    | <b>5x10<sup>-5</sup></b> |
|                | rs1557539  | 35.044                                                                     | 5.7                                | 0.02                      | <b>52.3</b>                                      | <b>5x10<sup>-13</sup></b> | 10                                                                                              | 3.59           | 0.34                     |
|                | rs1005570  | 35.045                                                                     | 48.2                               | <b>4x10<sup>-12</sup></b> | <b>29.5</b>                                      | <b>6x10<sup>-8</sup></b>  | 62                                                                                              | <b>2.30</b>    | <b>5x10<sup>-5</sup></b> |
|                | rs16996674 | 35.057                                                                     | 25.9                               | <b>4x10<sup>-7</sup></b>  | <b>38.4</b>                                      | <b>6x10<sup>-10</sup></b> | 40                                                                                              | 1.48           | 0.05                     |
|                | rs16996677 | 35.057                                                                     | 32.0                               | <b>2x10<sup>-8</sup></b>  | <b>35.8</b>                                      | <b>2x10<sup>-9</sup></b>  | 47                                                                                              | 1.59           | 0.02                     |
|                | rs736721   | 35.533                                                                     | 11.1                               | 0.0009                    | <b>38.5</b>                                      | <b>5x10<sup>-10</sup></b> | 22                                                                                              | 1.28           | 0.26                     |
| <i>PVALB</i>   | rs739031   | 35.538                                                                     | 11.6                               | 0.0007                    | <b>39.3</b>                                      | <b>4x10<sup>-10</sup></b> | 23                                                                                              | 1.32           | 0.20                     |
|                | rs2269511  | 35.541                                                                     | 0.7                                | 0.41                      | <b>41.4</b>                                      | <b>1x10<sup>-10</sup></b> | 2                                                                                               | 0.95           | 0.85                     |
|                | rs5756477  | 35.737                                                                     | 1.3                                | 0.25                      | <b>36.0</b>                                      | <b>2x10<sup>-9</sup></b>  | 4                                                                                               | 1.06           | 0.85                     |
| <i>TST</i>     | rs130598   | 35.738                                                                     | 2.4                                | 0.12                      | <b>33.5</b>                                      | <b>7x10<sup>-9</sup></b>  | 7                                                                                               | 1.08           | 0.80                     |
|                | rs470029   | 35.740                                                                     | 6.7                                | 0.01                      | <b>30.1</b>                                      | <b>4x10<sup>-8</sup></b>  | 18                                                                                              | 1.24           | 0.36                     |
|                | rs855788   | 35.804                                                                     | 22.4                               | <b>2x10<sup>-6</sup></b>  | <b>17.2</b>                                      | <b>3x10<sup>-5</sup></b>  | 57                                                                                              | 2.27           | 0.085                    |
|                | rs855787   | 35.805                                                                     | 2.7                                | 0.10                      | <b>32.4</b>                                      | <b>1x10<sup>-8</sup></b>  | 8                                                                                               | 0.99           | 1                        |
| <i>TMPRSS6</i> | rs2543519  | 35.810                                                                     | 4.8                                | 0.03                      | <b>31.0</b>                                      | <b>3x10<sup>-8</sup></b>  | 13                                                                                              | 1.34           | 0.13                     |
|                | rs1421312  | 35.818                                                                     | 0.7                                | 0.41                      | <b>34.3</b>                                      | <b>5x10<sup>-9</sup></b>  | 2                                                                                               | 0.88           | 0.55                     |

<sup>a</sup>Limited to individuals predicted with greater than 95% confidence to carry two African derived chromosomal segments at the locus.

<sup>b</sup>X<sup>2</sup>, Odds ratio (OR) and P are for logistic regression for the additive genetic model.

<sup>c</sup>Associations that are significant after correction (under the Bonferroni cutoff of P < 0.0005; see methods) are shown in bold.

<sup>d</sup>∞: Infinite, OR has zero in denominator since factor is absent from controls or is always present in cases.

Supplementary Table 2 *MYH9* SNP and haplotype associations with FSGS<sup>a</sup> for all African Americans cases and controls

| Variant    | Alleles |      | Normal Control risk allele freq. (%) <sup>b</sup> |                  | Risk allele               |                           |                          |                           |
|------------|---------|------|---------------------------------------------------|------------------|---------------------------|---------------------------|--------------------------|---------------------------|
|            |         |      | European American                                 | African American | Dominant                  |                           | Recessive                |                           |
|            | Ref.    | Risk | American                                          | American         | OR (95% CI) <sup>c</sup>  | P <sup>d</sup>            | OR (95% CI)              | P                         |
| rs7078     | G       | A    | 72.9                                              | 85.2             | 1.82 (0.5,9.99)0          | 0.42                      | <b>2.5 (1.63, 3.93)</b>  | <b>8X10<sup>-6</sup></b>  |
| rs12107    | A       | G    | 85.3                                              | 89.1             | ∞ (0.45, ∞) <sup>e</sup>  | 0.19                      | <b>3.17 (1.84,5.76)</b>  | <b>4X10<sup>-6</sup></b>  |
| rs735853   | G       | C    | 51.9                                              | 88.3             | 4.33 (0.62,187.3)         | 0.20                      | <b>8.82 (4.07,22.72)</b> | <b>5X10<sup>-13</sup></b> |
| rs5756129  | C       | T    | 77.9                                              | 79.3             | <b>13.21 (2.18,539)</b>   | <b>0.0003</b>             | <b>2.78 (1.88,4.19)</b>  | <b>4X10<sup>-8</sup></b>  |
| rs5756130  | T       | C    | 97.6                                              | 87.5             | ∞ (0.87, ∞)               | 0.07                      | 2.11 (1.35,3.37)         | 0.0005                    |
| rs11549907 | A       | G    | 98.5                                              | 93.7             | 1.14 (0.09,60.23)         | 1                         | 1.61 (0.96,2.81)         | 0.08                      |
| rs875725   | C       | T    | 98.5                                              | 92.8             | 0.77 (0.04,45.74)         | 1                         | 1.91 (1.15,3.27)         | 0.009                     |
| rs2187776  | T       | C    | 3.1                                               | 30.1             | 1.31 (0.96,1.8)           | 0.08                      | 1.26 (0.75,2.1)          | 0.37                      |
| rs4821480  | T       | G    | 4.3                                               | 67.4             | <b>4.81 (2.18,12.56)</b>  | <b>5X10<sup>-6</sup></b>  | <b>4.77 (3.27,7.07)</b>  | <b>2X10<sup>-19</sup></b> |
| rs2032487  | T       | C    | 4.3                                               | 63.7             | <b>5.01 (13.06,2.27)</b>  | <b>2X10<sup>-6</sup></b>  | <b>4.21 (2.97,6.01)</b>  | <b>2X10<sup>-18</sup></b> |
| rs4821481  | T       | C    | 4.3                                               | 62.3             | <b>5.04 (2.29, 13.15)</b> | <b>2X10<sup>-6</sup></b>  | <b>4.54 (3.21,6.48)</b>  | <b>1X10<sup>-20</sup></b> |
| rs3752462  | C       | T    | 31.0                                              | 72.0             | 5.30 (1.66,27.07)         | 0.001                     | <b>3.86 (2.67,5.66)</b>  | <b>4X10<sup>-15</sup></b> |
| rs5756152  | G       | A    | 2.6                                               | 26.1             | <b>3.37 (2.39,4.80)</b>   | <b>1X10<sup>-13</sup></b> | <b>4.91 (3.12,7.80)</b>  | <b>3X10<sup>-13</sup></b> |
| rs1557539  | C       | G    | 99.6                                              | 97.5             | ∞ (0.07, ∞)               | 1                         | 2.04 (0.88,5.51)         | 0.11                      |
| rs1005570  | G       | A    | 7.9                                               | 41.8             | <b>4.40 (2.74,7.33)</b>   | <b>2X10<sup>-12</sup></b> | <b>3.80 (2.70,5.37)</b>  | <b>3X10<sup>-15</sup></b> |
| rs16996674 | C       | T    | <1                                                | 23.5             | <b>2.62 (1.89,3.65)</b>   | <b>1X10<sup>-9</sup></b>  | <b>4.06 (2.48,6.69)</b>  | <b>7X10<sup>-9</sup></b>  |
| rs16996677 | G       | A    | <1                                                | 26.2             | <b>2.80 (2.01,3.92)</b>   | <b>1X10<sup>-10</sup></b> | <b>3.89 (2.50,6.09)</b>  | <b>4X10<sup>-10</sup></b> |
| Haplotypes |         |      |                                                   |                  |                           |                           |                          |                           |
| E-1        | GCCT    |      | 4.1                                               | 59.7             | <b>4.68 (2.32,11.38)</b>  | <b>2X10<sup>-6</sup></b>  | <b>4.98 (3.54,7.07)</b>  | <b>4X10<sup>-23</sup></b> |
| E-2        | TTTC    |      | 69.0                                              | 20.5             | <b>0.21 (0.13,0.34)</b>   | <b>1X10<sup>-13</sup></b> | 0.15 (0.02,0.61)         | 0.002                     |
| E-3        | TTTT    |      | 26.9                                              | 11.9             | <b>0.43 (0.26,0.68)</b>   | <b>0.0002</b>             | 0.00 (0.00,0.61)         | 0.003                     |
| E-4        | GTTC    |      | <1                                                | 4.0              | 0.76 (0.38,1.45)          | 0.46                      | -                        | -                         |
| E-5        | GCCC    |      | <1                                                | 3.2              | 0.48 (0.19,1.06)          | 0.07                      | -                        | -                         |

<sup>a</sup>Association analysis for combined idiopathic or HIV-associated FSGS (241 cases and 611 controls).

<sup>b</sup>Population frequencies for normal controls in European Americans (n=221) and African Americans (n=370). <sup>c</sup>Odds ratio confidence intervals and probabilities calculated with a Fisher's exact test. <sup>d</sup>Tests that are significant after correction (under the Bonferroni cutoff of P < 0.0005; see methods) are shown in bold. <sup>e</sup>Odds Ratios with a denominator equal to zero are shown as infinite (∞).

Supplementary Table 3 *MYH9* associations in idiopathic FSGS, HIV-1 associated FSGS, and hypertensive ESKD, dominant model for risk factor

| Variant          | African Americans                   |                                      |                             |                          | European-Americans                                         |                         |                         |                         |
|------------------|-------------------------------------|--------------------------------------|-----------------------------|--------------------------|------------------------------------------------------------|-------------------------|-------------------------|-------------------------|
|                  | Idiopathic FSGS(n=587) <sup>a</sup> |                                      | HIV-associated FSGS (n=298) |                          | Hypertensive End Stage Kidney Disease (n=433) <sup>b</sup> |                         | Idiopathic FSGS (n=411) |                         |
|                  | OR                                  | <i>P</i> <sub>FET</sub> <sup>c</sup> | OR                          | <i>P</i> <sub>FET</sub>  | OR                                                         | <i>P</i> <sub>FET</sub> | OR                      | <i>P</i> <sub>FET</sub> |
| rs7078           | 1 (0.21,6.27)                       | 1                                    | ∞,(0.37,∞) <sup>e</sup>     | 0.36                     | NT <sup>d</sup>                                            | NT                      | 0.88 (0.39,2.05)        | 0.85                    |
| rs12107          | ∞,(0.09,∞)                          | 1                                    | ∞,(0.14,∞)                  | 1                        | 0 (0,48)                                                   | 1.00                    | 0.53 (0.07,3.99)        | 0.42                    |
| rs735853         | 3.55 (0.45,161.13)                  | 0.28                                 | ∞,(0.14,∞)                  | 1                        | 2.49 (0.35,27.81)                                          | 0.41                    | 0.85 (0.48,1.51)        | 0.58                    |
| rs5756129        | 11.88 (1.89,493.19)                 | 0.001                                | ∞,(0.48,∞)                  | 0.22                     | 1.62 (0.52,5.22)                                           | 0.44                    | 1.03 (0.35,3.44)        | 1                       |
| rs5756130        | 0.53 (0.31,0.88)                    | 0.10                                 | 0.28 (0.07,0.82)            | 1                        | 2.46 (0.35,27.48)                                          | 0.42                    | — <sup>f</sup>          | —                       |
| rs11549907       | 0.88 (0.47,1.59)                    | 1                                    | 0.2 (0.02,0.82)             | 1                        | NT                                                         | NT                      | 0 (0,20.91)             | 0.35                    |
| rs875725         | 0.72 (0.39,1.29)                    | 1                                    | 0.24 (0.05,0.8)             | —                        | 0 (0,48.04)                                                | 1                       | —                       | —                       |
| rs2187776        | 1.3 (0.9,1.89)                      | 0.17                                 | 1.43 (0.75,2.77)            | 0.29                     | 1.09 (0.73,1.62)                                           | 0.70                    | 1.77 (0.7,4.48)         | 0.19                    |
| rs4821480        | <b>4.12 (1.81,10.99)</b>            | <b>0.0001</b>                        | ∞,(1.55,∞)                  | 0.006                    | 1.81 (0.92,3.66)                                           | 0.08                    | 1.55 (0.7,3.36)         | 0.26                    |
| rs2032487        | <b>4.3 (1.89,11.46)</b>             | <b>7x10<sup>-5</sup></b>             | ∞,(1.57,∞)                  | 0.006                    | NT                                                         | NT                      | 1.55 (0.7,3.36)         | 0.26                    |
| rs4821481        | <b>4.32 (1.9,11.5)</b>              | <b>7x10<sup>-5</sup></b>             | ∞,(1.63,∞)                  | 0.007                    | 1.36 (0.73,2.53)                                           | 0.30                    | 1.56 (0.71,3.37)        | 0.26                    |
| rs3752462        | 4.77 (1.44,24.89)                   | 0.005                                | ∞,(0.6,∞)                   | 0.13                     | <b>3.37 (1.31,9.78)</b>                                    | <b>0.006</b>            | 1.06 (0.67,1.68)        | 0.82                    |
| rs5756152        | <b>2.98 (2,4.48)</b>                | <b>1x10<sup>-8</sup></b>             | <b>5.53 (2.52,13.5)</b>     | <b>1x10<sup>-6</sup></b> | <b>2.06 (1.37,3.11)</b>                                    | <b>0.0003</b>           | 1.73 (0.64,4.63)        | 0.24                    |
| rs1557539        | 0.71 (0.22,1.92)                    | 1                                    | 0.23 (0.01,1.5)             | 1                        | NT                                                         | NT                      | —                       | —                       |
| rs1005570        | <b>4.5 (2.64,8.05)</b>              | <b>4x10<sup>-10</sup></b>            | 4.94 (1.71,19.57)           | 0.0007                   | <b>1.68 (1.02,2.77)</b>                                    | <b>0.03</b>             | 0.92 (0.47,1.76)        | 0.88                    |
| rs16996674       | <b>2.57 (1.75,3.8)</b>              | <b>5x10<sup>-7</sup></b>             | 3.08 (1.55,6.39)            | 0.0007                   | 1.4 (0.94,2.09)                                            | 0.10                    | ∞,(0.35,∞)              | 0.12                    |
| rs16996677       | <b>2.69 (1.82,3.99)</b>             | <b>1x10<sup>-7</sup></b>             | 3.41 (1.68,7.34)            | 0.0007                   | 1.36 (0.9,2.04)                                            | 0.14                    | ∞,(0.35,∞)              | 0.12                    |
| Haplotype        |                                     |                                      |                             |                          |                                                            |                         |                         |                         |
| E-1              | <b>3.99 (1.83,9.91)</b>             | <b>6x10<sup>-5</sup></b>             | ∞,(1.75,∞)                  | 0.004                    | <b>2.45 (1.26,4.89)</b>                                    | <b>0.005</b>            | 1.63 (0.74,3.58)        | 0.18                    |
| E-2 <sup>g</sup> | 0.16 (0.02,0.64)                    | 0.003                                | 0 (0,2.69)                  | 0.36                     | 0.36 (0.08,1.3)                                            | 0.09                    | 0.95 (0.6,1.5)          | 0.82                    |
| E-3              | 0 (0,0.78)                          | 0.02                                 | 0 (0,3.19)                  | 0.36                     | 1.24 (0.14,15)                                             | 1                       | 1.67 (0.68,4.03)        | 0.21                    |
| E-4              | —                                   | —                                    | —                           | —                        | —                                                          | —                       | —                       | —                       |
| E-5              | —                                   | —                                    | —                           | —                        | —                                                          | —                       | —                       | —                       |

<sup>a</sup>For idiopathic and HIV-associated FSGS in African-Americans, comparisons significant after correction are shown in bold.

<sup>b</sup>For ESKD and European-American FSGS, nominally significant associations confirmatory of highly significant associations (supplementary table 2) in African American FSGS are shown in bold. <sup>c</sup>Fisher's exact test. <sup>d</sup>Not genotyped for SNP. <sup>e</sup>infinity, odds ratio with a denominator equal to zero. <sup>f</sup>Rare genotype or haplotype absent from both cases and controls. <sup>g</sup>For haplotypes E-2 to E-5 the recessive model is given (corresponding to taking absence of the haplotype as a dominant susceptible factor).

Supplementary Table 4 MYH9 Haplotype associations with FSGS and End Stage Kidney Disease (ESKD)

|                                                             |           |                  |                                | African Americans         |                     |                               |                    |                                           |                  |                                        |                  | European Americans        |                  |
|-------------------------------------------------------------|-----------|------------------|--------------------------------|---------------------------|---------------------|-------------------------------|--------------------|-------------------------------------------|------------------|----------------------------------------|------------------|---------------------------|------------------|
|                                                             |           |                  |                                | Idiopathic FSGS (N = 558) |                     | HIV-associated FSGS (N = 294) |                    | Type 2 Diabetes-associated ESKD (N = 476) |                  | Hypertensive-associated ESKD (N = 433) |                  | Idiopathic FSGS (N = 346) |                  |
| Frequency                                                   |           |                  |                                | OR <sup>c</sup>           | P <sub>FET</sub>    | OR                            | P <sub>FET</sub>   | OR                                        | P <sub>FET</sub> | OR                                     | P <sub>FET</sub> | OR                        | P <sub>FET</sub> |
| a) Haplotypes for defined haplotype blocks <sup>a</sup>     |           |                  |                                |                           |                     |                               |                    |                                           |                  |                                        |                  |                           |                  |
| Haplotypes for SNPs rs5756130 to rs11549907                 |           |                  |                                |                           |                     |                               |                    |                                           |                  |                                        |                  |                           |                  |
|                                                             |           | African American | European American <sup>b</sup> |                           |                     |                               |                    |                                           |                  |                                        |                  |                           |                  |
| B1-1 <sup>d</sup>                                           | CGT       | 0.82             | 0.95                           | 1.61                      | 0.01                | 3.24                          | 0.002              | NT <sup>e</sup>                           | NT               | NT                                     | NT               | 0.43                      | 0.02             |
| B1-2                                                        | TGT       | 0.10             | 0.03                           | 0.54                      | 0.01                | 0.36                          | 0.06               | NT                                        | NT               | NT                                     | NT               | 2.71                      | 0.02             |
| B1-3                                                        | CAC       | 0.06             | < 0.01                         | 1.12                      | 0.77                | 0.26                          | 0.07               | NT                                        | NT               | NT                                     | NT               | —                         | —                |
| B1-4                                                        | CGC       | 0.01             | < 0.01                         | 0                         | 0.03                | 0.51                          | 1                  | NT                                        | NT               | NT                                     | NT               | —                         | —                |
| Haplotypes for SNPs rs2187776 to rs4821481                  |           |                  |                                |                           |                     |                               |                    |                                           |                  |                                        |                  |                           |                  |
| B2-1                                                        | TGCC      | 0.39             | 0.017                          | 2.12                      | 1x10 <sup>-8</sup>  | 2.24                          | 0.0003             | 0.95                                      | 0.72             | 1.28                                   | 0.06             | 1.90                      | 0.26             |
| B2-2                                                        | CGCC      | 0.31             | 0.034                          | 1.21                      | 0.17                | 1.38                          | 0.19               | 1.22                                      | 0.17             | 1.19                                   | 0.23             | 1.92                      | 0.14             |
| B2-3                                                        | TTTT      | 0.25             | 0.895                          | 0.27                      | 6x10 <sup>-15</sup> | 0.18                          | 9x10 <sup>-8</sup> | 0.97                                      | 0.88             | 0.73                                   | 0.02             | 0.51                      | 0.04             |
| B2-4                                                        | TCTT      | 0.04             | < 0.01                         | 0.95                      | 1                   | 0.26                          | 0.22               | 0.52                                      | 0.05             | 0.48                                   | 0.02             | —                         | —                |
| Haplotypes for SNPs rs3752462 to rs5756152                  |           |                  |                                |                           |                     |                               |                    |                                           |                  |                                        |                  |                           |                  |
| B4-1                                                        | TG        | 0.45             | 0.305                          | 0.79                      | 0.07                | 0.80                          | 0.38               | 0.89                                      | 0.42             | 0.83                                   | 0.15             | 1.18                      | 0.35             |
| B4-2                                                        | TA        | 0.32             | 0.028                          | 2.67                      | 4x10 <sup>-13</sup> | 2.99                          | 1x10 <sup>-6</sup> | 1.28                                      | 0.11             | 1.72                                   | 0.0001           | 1.72                      | 0.25             |
| B4-3                                                        | CG        | 0.23             | 0.667                          | 0.33                      | 7x10 <sup>-11</sup> | 0.17                          | 6x10 <sup>-7</sup> | 0.90                                      | 0.49             | 0.69                                   | 0.01             | 0.80                      | 0.18             |
| Haplotypes for SNPs rs16996674 to rs16996677                |           |                  |                                |                           |                     |                               |                    |                                           |                  |                                        |                  |                           |                  |
| B7-1                                                        | CG        | 0.68             | 1                              | 0.41                      | 3x10 <sup>-11</sup> | 0.39                          | 2x10 <sup>-5</sup> | 1.12                                      | 0.46             | 0.79                                   | 0.08             | 0.00                      | 0.12             |
| B7-2                                                        | TA        | 0.29             | < 0.01                         | 2.41                      | 2x10 <sup>-10</sup> | 2.40                          | 0.0001             | 0.84                                      | 0.28             | 1.22                                   | 0.17             | —                         | —                |
| B7-3                                                        | CA        | 0.03             | < 0.01                         | 1.51                      | 0.27                | 2.35                          | 0.24               | 1.44                                      | 0.54             | 1.53                                   | 0.35             | —                         | —                |
| b) Maximal length robustly inferred haplotypes <sup>f</sup> |           |                  |                                |                           |                     |                               |                    |                                           |                  |                                        |                  |                           |                  |
| Haplotypes for SNPs rs735853 to rs4821481                   |           |                  |                                |                           |                     |                               |                    |                                           |                  |                                        |                  |                           |                  |
| M1-1                                                        | CTCTTGCC  | 0.32             | < 0.01                         | 3.07                      | 8E-07               | 2.36                          | 3E-10              | 1.07                                      | 0.70             | 1.49                                   | 0.005            | —                         | —                |
| M1-2                                                        | CTCTCGCC  | 0.30             | 0.03                           | 1.34                      | 0.23                | 1.20                          | 0.18               | 1.24                                      | 0.15             | 1.17                                   | 0.25             | 1.98                      | 0.09             |
| M1-3                                                        | CTCTTTTT  | 0.07             | 0.24                           | 0.52                      | 0.28                | 0.64                          | 0.12               | 0.78                                      | 0.36             | 0.76                                   | 0.26             | 0.66                      | 0.03             |
| M1-4                                                        | GTCCTTTTT | 0.07             | 0.42                           | 0.21                      | 0.01                | 0.16                          | 2E-07              | 0.72                                      | 0.21             | 0.74                                   | 0.20             | 0.96                      | 0.81             |
| M1-5                                                        | CTCCTGCC  | 0.06             | < 0.01                         | 0.33                      | 0.06                | 0.88                          | 0.68               | 0.72                                      | 0.30             | 0.71                                   | 0.26             | —                         | —                |
| M1-6                                                        | CCCTTTTT  | 0.06             | 0.18                           | 0.00                      | 0.002               | 0.28                          | 0.0002             | 0.82                                      | 0.50             | 0.70                                   | 0.18             | 1.07                      | 0.77             |
| M1-7                                                        | CCTTTTTT  | 0.05             | 0.03                           | 0.26                      | 0.06                | 0.26                          | 0.0002             | 1.47                                      | 0.19             | 0.87                                   | 0.67             | 2.60                      | 0.03             |
| M1-8                                                        | CCTTTGTT  | 0.04             | < 0.01                         | 0.25                      | 0.22                | 0.97                          | 1                  | 0.55                                      | 0.09             | 0.47                                   | 0.02             | —                         | —                |
| Haplotypes for SNPs rs3752462 to rs1557539                  |           |                  |                                |                           |                     |                               |                    |                                           |                  |                                        |                  |                           |                  |
| M2-1                                                        | TGG       | 0.45             | 0.31                           | 0.82                      | 0.38                | 0.78                          | 0.07               | 0.94                                      | 0.64             | 0.86                                   | 0.23             | 1.17                      | 0.39             |
| M2-2                                                        | TAG       | 0.30             | 0.02                           | 3.66                      | 2E-08               | 2.80                          | 5E-14              | 1.21                                      | 0.24             | 1.73                                   | 0.0002           | 1.50                      | 0.45             |
| M2-3                                                        | CGG       | 0.22             | 0.65                           | 0.15                      | 3E-07               | 0.31                          | 8E-11              | 0.87                                      | 0.40             | 0.67                                   | 0.008            | 0.79                      | 0.16             |
| M2-4                                                        | TAC       | 0.02             | < 0.01                         | 0                         | 0.05                | 0.73                          | 0.78               | 1.39                                      | 0.63             | 1.03                                   | 1                | —                         | —                |
| Haplotypes for SNPs rs1557539 to rs16996677                 |           |                  |                                |                           |                     |                               |                    |                                           |                  |                                        |                  |                           |                  |
| M3-1                                                        | GGCG      | 0.48             | 0.91                           | 0.32                      | 1E-06               | 0.37                          | 5E-14              | 1.24                                      | 0.11             | 0.83                                   | 0.15             | 1.18                      | 0.66             |
| M3-2                                                        | GATA      | 0.29             | < 0.01                         | 2.49                      | 7E-05               | 2.39                          | 3E-10              | 0.85                                      | 0.31             | 1.26                                   | 0.10             | —                         | —                |
| M3-3                                                        | GACG      | 0.18             | 0.07                           | 1.54                      | 0.12                | 1.40                          | 0.05               | 0.74                                      | 0.10             | 0.91                                   | 0.57             | 0.71                      | 0.36             |
| M3-4                                                        | GACA      | 0.03             | < 0.01                         | 2.31                      | 0.24                | 1.48                          | 0.27               | 1.28                                      | 0.67             | 1.48                                   | 0.45             | —                         | —                |
| M3-5                                                        | CGCG      | 0.02             | < 0.01                         | 0                         | 0.22                | 0.45                          | 0.29               | 1.92                                      | 0.24             | 1.41                                   | 0.63             | —                         | —                |

<sup>a</sup>Haplotype blocks as defined by the confidence interval method (reference 38), using the standard parameter setting. In general the block haplotypes are not fully resolved as only a subset of the tagging SNPs were typed.

<sup>b</sup>Analysis was not done for haplotypes with frequency < 1%. There were no haplotypes unique to European-Americans with frequency  $\geq$  1%.

<sup>c</sup>OR and P<sub>FET</sub> (FET: Fisher exact test) are for an allele model.

<sup>d</sup>Haplotypes are numbered by haplotype block within MYH9 coding region and in order of decreasing frequency within blocks.

<sup>e</sup>NT: SNPs needed to infer these haplotypes not typed in this group.

<sup>f</sup>Longest haplotypes that could be inferred with uncertainty < 2% (uncertainty measured as entropy; < 2% of maximal entropy)

Supplementary Table 5 Association of MYH9 SNPs and haplotypes with Type II Diabetes End Stage Kidney Disease (n=476)

| Variant    | Risk Allele Dominant |           | Risk Allele Recessive |           |
|------------|----------------------|-----------|-----------------------|-----------|
|            | OR                   | $P_{FET}$ | OR                    | $P_{FET}$ |
| rs7078     | NT <sup>a</sup>      | NT        | NT                    | NT        |
| rs12107    | 0.00                 | 0.52      | 1.24                  | 0.45      |
| rs735853   | 2.98                 | 0.23      | 1.04                  | 0.91      |
| rs5756129  | 1.11                 | 0.82      | 0.85                  | 0.44      |
| rs5756130  | 0.98                 | 1.00      | 0.83                  | 0.44      |
| rs11549907 | NA                   | NT        | NT                    | NT        |
| rs875725   | 0.00                 | 1.00      | 1.46                  | 0.18      |
| rs2187776  | 1.26                 | 0.22      | 1.55                  | 0.15      |
| rs4821480  | 0.92                 | 0.79      | 1.07                  | 0.78      |
| rs2032487  | NA                   | NT        | NT                    | NT        |
| rs4821481  | 0.89                 | 0.70      | 1.32                  | 0.16      |
| rs3752462  | 1.28                 | 0.50      | 1.10                  | 0.64      |
| rs5756152  | 1.36                 | 0.11      | 1.32                  | 0.48      |
| rs1557539  | — <sup>b</sup>       | —         | 0.50                  | 0.16      |
| rs1005570  | 0.62                 | 0.02      | 0.86                  | 0.55      |
| rs16996674 | 0.87                 | 0.45      | 0.61                  | 0.30      |
| rs16996677 | 0.87                 | 0.51      | 0.81                  | 0.57      |
| Haplotype  |                      |           |                       |           |
| E-1        | 1.10                 | 0.80      | 1.20                  | 0.38      |
| E-2        | 1.04                 | 0.92      | 0.98                  | 1.00      |
| E-3        | 0.87                 | 0.52      | 1.71                  | 0.71      |
| E-4        | 0.50                 | 0.04      | —                     | —         |
| E-5        | 1.21                 | 0.71      | —                     | —         |

<sup>a</sup>Not tested. <sup>b</sup>Genotype missing for both cases and controls for this analysis.
